# Supplementary material for: Bioinformatics Study of Structural Patterns in Plant MicroRNA Precursors
Source: Hindawi journal article supplement (doi:10.1155/2017/6783010), 2017-01-01
Supplement: f1 [file 6783010.f1.pdf]

Supplementary material

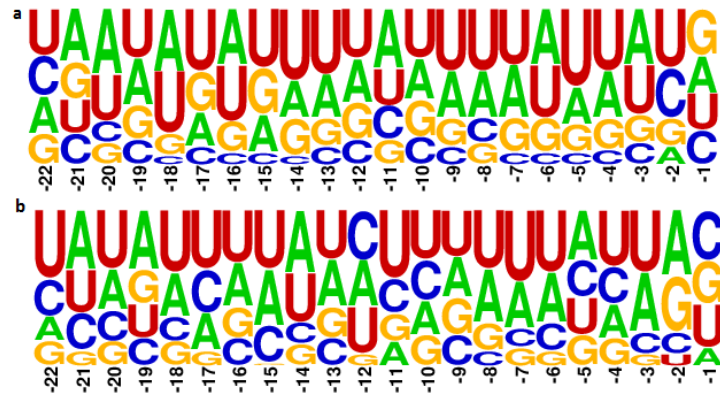

Figure S1. WebLOGO plots of nucleotide frequency in miRNA:miRNA\* vicinity on the side of the second cut. (a)regAC, (b)regBD.

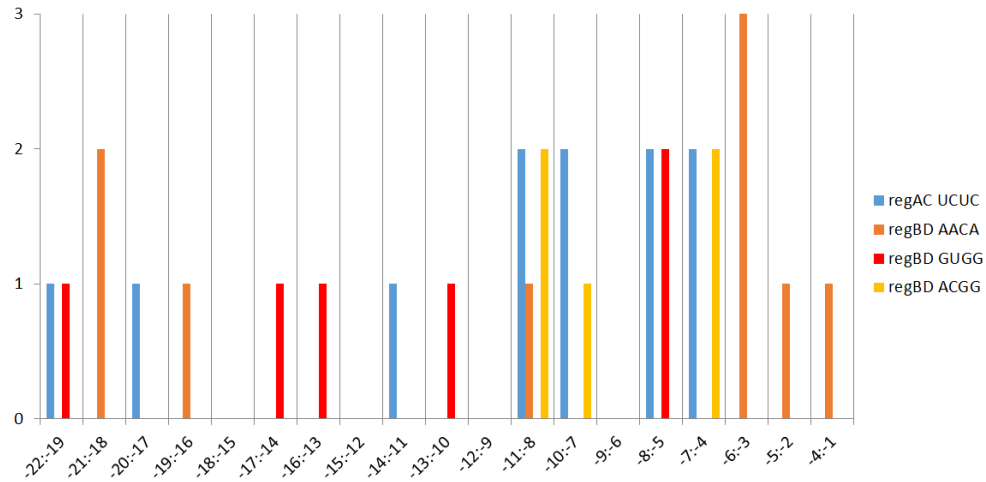

Figure S2. A number of particular sequence motifs in the first-cut regions *regAC* and *regBD*.

Table S1. Percentage of each nucleotide occurrence in the first-cut region *regAC* provided by WebLOGO.

| Position | A  | C  | G  | U  |
|----------|----|----|----|----|
| -22      | 22 | 6  | 36 | 36 |
| -21      | 28 | 16 | 18 | 38 |
| -20      | 36 | 18 | 10 | 36 |
| -19      | 30 | 8  | 22 | 40 |
| -18      | 36 | 28 | 8  | 28 |
| -17      | 36 | 6  | 34 | 24 |
| -16      | 24 | 8  | 44 | 24 |
| -15      | 26 | 30 | 20 | 24 |
| -14      | 28 | 16 | 24 | 32 |
| -13      | 40 | 20 | 26 | 14 |
| -12      | 20 | 24 | 30 | 26 |
| -11      | 18 | 16 | 20 | 46 |
| -10      | 32 | 10 | 28 | 30 |
| -9       | 14 | 18 | 34 | 34 |
| -8       | 26 | 22 | 18 | 34 |
| -7       | 16 | 30 | 26 | 28 |
| -6       | 28 | 18 | 26 | 28 |
| -5       | 14 | 26 | 14 | 46 |
| -4       | 30 | 12 | 26 | 32 |
| -3       | 20 | 14 | 36 | 30 |
| -2       | 18 | 12 | 44 | 26 |
| -1       | 36 | 14 | 24 | 26 |

**Table S2. Percentage of each nucleotide occurrence in the first-cut region *regBD* provided by WebLOGO.**

| <b>Position</b> | <b>A</b> | <b>C</b> | <b>G</b> | <b>U</b> |
|-----------------|----------|----------|----------|----------|
| <b>-22</b>      | 18       | 28       | 16       | 38       |
| <b>-21</b>      | 30       | 12       | 12       | 46       |
| <b>-20</b>      | 26       | 22       | 16       | 36       |
| <b>-19</b>      | 28       | 24       | 16       | 32       |
| <b>-18</b>      | 28       | 22       | 12       | 38       |
| <b>-17</b>      | 20       | 26       | 20       | 34       |
| <b>-16</b>      | 10       | 36       | 34       | 20       |
| <b>-15</b>      | 16       | 24       | 20       | 40       |
| <b>-14</b>      | 22       | 22       | 18       | 38       |
| <b>-13</b>      | 20       | 28       | 14       | 38       |
| <b>-12</b>      | 24       | 18       | 8        | 50       |
| <b>-11</b>      | 26       | 18       | 26       | 30       |
| <b>-10</b>      | 16       | 24       | 18       | 42       |
| <b>-9</b>       | 14       | 30       | 20       | 36       |
| <b>-8</b>       | 26       | 16       | 28       | 30       |
| <b>-7</b>       | 26       | 36       | 14       | 24       |
| <b>-6</b>       | 28       | 22       | 22       | 28       |
| <b>-5</b>       | 42       | 8        | 28       | 22       |
| <b>-4</b>       | 30       | 30       | 24       | 16       |
| <b>-3</b>       | 26       | 38       | 2        | 34       |
| <b>-2</b>       | 20       | 42       | 14       | 24       |
| <b>-1</b>       | 26       | 34       | 12       | 28       |

**Table S3. Percentage of each nucleotide occurrence in random sequences provided by WebLOGO.**

| <b>Position</b> | <b>A</b> | <b>C</b> | <b>G</b> | <b>U</b> |
|-----------------|----------|----------|----------|----------|
| <b>-22</b>      | 24       | 26       | 26       | 24       |
| <b>-21</b>      | 34       | 22       | 22       | 22       |
| <b>-20</b>      | 32       | 20       | 30       | 18       |
| <b>-19</b>      | 28       | 16       | 28       | 28       |
| <b>-18</b>      | 26       | 24       | 18       | 32       |
| <b>-17</b>      | 34       | 20       | 32       | 14       |
| <b>-16</b>      | 24       | 20       | 32       | 24       |
| <b>-15</b>      | 38       | 26       | 16       | 20       |
| <b>-14</b>      | 24       | 38       | 10       | 28       |
| <b>-13</b>      | 24       | 40       | 20       | 16       |
| <b>-12</b>      | 22       | 30       | 22       | 26       |
| <b>-11</b>      | 24       | 22       | 20       | 34       |
| <b>-10</b>      | 28       | 32       | 26       | 14       |
| <b>-9</b>       | 24       | 16       | 32       | 28       |
| <b>-8</b>       | 18       | 28       | 30       | 24       |
| <b>-7</b>       | 22       | 24       | 32       | 22       |
| <b>-6</b>       | 20       | 24       | 28       | 28       |
| <b>-5</b>       | 32       | 26       | 28       | 14       |
| <b>-4</b>       | 16       | 32       | 26       | 26       |
| <b>-3</b>       | 20       | 24       | 32       | 24       |
| <b>-2</b>       | 30       | 28       | 22       | 20       |
| <b>-1</b>       | 26       | 28       | 22       | 24       |

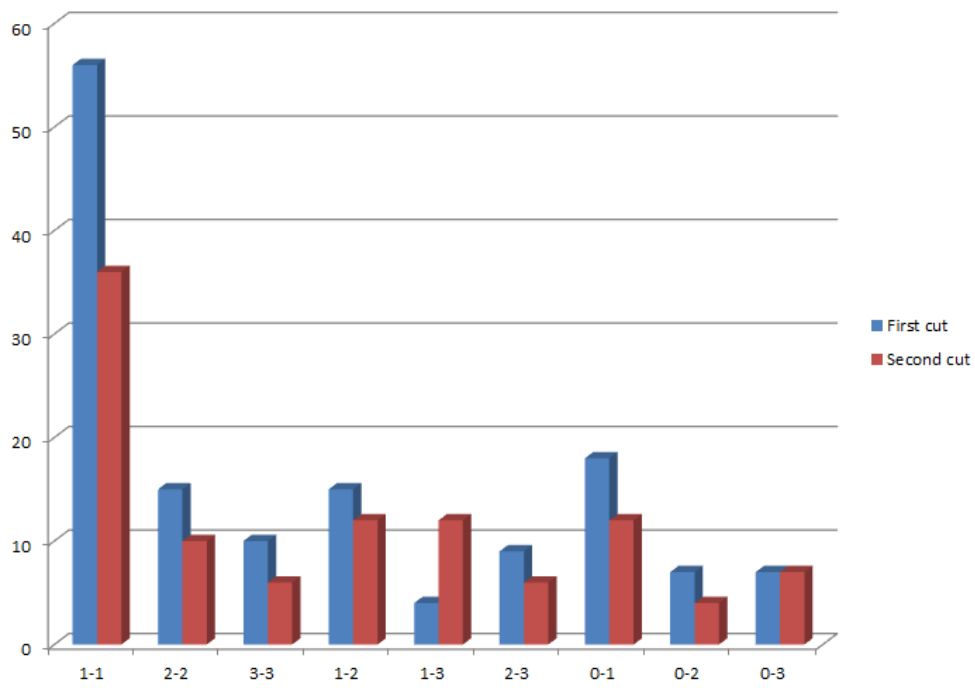

**Figure S3.** A number of particular secondary structure motifs (bulges and internal loops) in the first-cut (blue) and the second-cut (red) region.
